# Supplementary material for: Glucosylceramide in bunyavirus particles is essential for virus binding to host cells
Source: Cell Mol Life Sci. 2024 Feb 1;81(1):71. doi: 10.1007/s00018-023-05103-0 (PMC10834583; doi:10.1007/s00018-023-05103-0)
Supplement: Supplementary file 2 — Supplementary file2 Supplemental Table S2. Lipidomic analysis of purified Uukuniemi virus (UUKV) and Semliki forest virus (SFV) particles. This table is related to Figures 1C, 9B, S2A, and S5. (XLSX 53 KB) [file 18_2023_5103_MOESM2_ESM.xlsx]

## Sheet: Table S2 (Fig. 1C, 9B, S2A, S5)
Values in [µM]
Lipid	UUKV	UUKV	UUKV	SFV	SFV	SFV	not infected (mock)	not infected (mock)
CE 14:1	0	0	0	0	0	0	0.000248706	0
CE 14:0	0.00153902	0.000860543	0.000597223	0.010572	0.00682408	0.00491913	0.0122087	0.00390547
CE 15:0	0.00276112	0.00418249	0.00598621	0.0261152	0.0121819	0.0186676	0.0218701	0.00890085
CE 16:2	0.00131289	0.0014083	0.0027863	0.00816142	0	0.00274092	0.00184074	0.00118706
CE 16:1	0	0.00680149	0	0.00865369	0	0	0.0175744	0.0011375
CE 16:0	0.00694693	0.0157656	0.0122561	0.0262275	0.0387552	0.0241787	0.0293084	0.0116797
CE 17:1	0	0	0	0	0	0	0.00611436	0.00145958
CE 17:0	0	0.00159168	0.00115301	0.00350391	0.00946079	0.0045402	0.0109516	0.00164999
CE 18:3	0.001743	0.00131777	0.000321559	0.0187064	0.00343791	0.00387965	0.00134277	0.00141157
CE 18:2	0	0.00218722	0	0.00353547	0	0	0.0154973	0.00127688
CE 18:1	0.00136386	0.0162931	0.000500419	0.00327365	0	0.00991441	0.078362	0.0059307
CE 18:0	0.00893156	0.00874537	0.0126139	0.0356415	0.0325857	0.0177302	0.0124322	0.00541809
CE 19:1	3.83462e-05	0.00135164	0	0.000527758	0.000514878	0.00280674	0.00242942	0.000238845
CE 20:4	0	0	0	0.00501879	0	0.000872034	0	0
CE 20:3	0	0	0.000952379	0.00580222	0.0029088	0	0.000623332	0
CE 20:2	0	0	0.000384186	0	0.00226309	0	0.000731099	0
CE 20:1	0	0.000112378	0	0.00326046	0	0	0.0012411	0
CE 22:6	8.93936e-05	0	0	0.00406676	0.00098106	0.00360145	0.00188312	0.000849321
CE 22:5	0.000498683	0.000953321	0.00344405	0.00684595	0.0151499	0.0114095	0.00830269	0.00353967
Cer 34:1;2	0.325826	0.549953	0.693346	0.343622	0.413264	0.245553	0.027813	0.052421
Cer 36:1;2	0.00785785	0.0164178	0.015784	0.00731141	0.00693341	0.00614287	0.00248188	0.00101143
Cer 38:1;2	0.00128258	0.00493235	0.00178275	0.00113261	0.0026088	0.0011511	0.000299163	0
Cer 40:2;2	0.00102673	0.0011128	0.0018884	0	0.00259136	0.000382854	0.000589431	0
Cer 40:1;2	0.00911301	0.0127174	0.0220146	0.0185882	0.0187827	0.0164933	0.00178712	0.00181456
Cer 40:2;3	0	0.00703554	0.00169342	0.00228213	0	0.00213434	0.000946903	0.000562644
Cer 42:2;2	0.0242698	0.0540299	0.0455195	0.022595	0.0335009	0.0234609	0.00346739	0.00550502
Cer 42:1;2	0.018855	0.0362217	0.0518842	0.0355813	0.040483	0.0331972	0.00641659	0.00257292
Chol	36.4895	52.3668	38.0661	90.6913	97.8436	61.8272	1.85781	1.65287
Hex2Cer 32:1;2	0.00957815	0.0223632	0	0	0	0.0132804	0	0
Hex2Cer 34:1;2	0.318087	0.265688	0.288853	0.674877	0.924524	0.679515	0.013738	0.0223709
Hex2Cer 36:1;2	0.00710637	0.0223632	0.0144285	0	0	0.0125426	0	0
Hex2Cer 36:1;3	0	0.0230307	0.00495096	0	0	0	0	0
Hex2Cer 38:1;2	0.0078788	0.0173565	0.00650698	0.0119634	0	0.0118048	0	0
Hex2Cer 38:2;3	0	0.0153538	0	0	0	0.00885362	0	0
Hex2Cer 40:1;2	0.0106596	0.0343792	0.0189551	0.0249824	0.0676594	0.0236097	0	0
Hex2Cer 40:2;3	0.0106596	0	0.00594115	0	0	0	0	0
Hex2Cer 40:1;3	0	0.0110147	0.00622407	0	0	0.018445	0	0
Hex2Cer 42:2;2	0.0553061	0.0370494	0.0339495	0.0847994	0.126977	0.0853391	0	0
Hex2Cer 42:1;2	0.039394	0.0250334	0.0329593	0.0696692	0.118172	0.074518	0	0.00702677
Hex2Cer 42:2;3	0	0	0.00664843	0	0	0	0	0
Hex2Cer 42:1;3	0	0	0	0	0	0	0	0
HexCer 34:1;2	3.74057	4.00836	4.76986	2.57753	2.51004	1.56981	0.0420202	0.063432
HexCer 36:1;2	0.0953019	0.11235	0.147962	0.0446691	0.0464536	0.0294014	0.00264268	0.00234297
HexCer 38:1;2	0.0337172	0.0337774	0.0515539	0.0223052	0.0352035	0.0224748	0	0
HexCer 38:2;3	0.00467591	0.00660093	0.00225753	0	0	0.000672052	0	0
HexCer 40:2;2	0.0163277	0.0162777	0.0100792	0.00515292	0.00690426	0.00587843	0	0
HexCer 40:1;2	0.21174	0.217821	0.372422	0.192068	0.231411	0.155738	0.00220223	0.004708
HexCer 40:3;3	0.00710741	0.00604412	0.00581604	0.00658997	0	0.00270186	0	0
HexCer 40:2;3	0.020601	0.0168688	0.0238542	0.0202775	0.015764	0.00850449	0.00110112	0.00188456
HexCer 40:1;3	0.00324264	0.00289228	0	0.00858522	0	0	0	0.0021647
HexCer 42:3;2	0.00443632	0.00774599	0.00344222	0.00478548	0.00447873	0	0.00168838	0
HexCer 42:2;2	0.343482	0.411554	0.393404	0.167573	0.19415	0.121543	0.0046614	0.00664691
HexCer 42:1;2	0.268932	0.317842	0.578401	0.339805	0.320114	0.256396	0.0026107	0.0072577
HexCer 42:3;3	0.00272839	0.00503589	0.00340097	0.022873	0.00816786	0.00406639	0.0018719	0.00147709
HexCer 42:2;3	0.00618597	0.0104662	0.00375386	0.0094755	0.006861	0.00417973	0.000621265	0
HexCer 42:1;3	0.000950229	0	0.000981807	0.00648879	0.0059173	0.0010622	0	0
LPC 14:1	0.00297107	0	0	0	0.00104494	0.000442565	0	0
LPC 14:0	0.00243618	0.00813375	0.00412439	0.0185257	0.00389042	0.00413522	0.00127575	0.00095438
LPC 16:1	0.00853455	0.0149753	0.0105082	0.0326519	0.0190549	0.0153958	0.00179095	0.0028004
LPC 16:0	0.0665191	0.143446	0.0848965	0.200686	0.171687	0.104332	0.00203826	0.0145163
LPC 18:3	0.0033217	0.0103768	0.00109877	0.00512993	0.00370054	0.00198281	0.00154028	0.00184477
LPC 18:2	0.0092375	0.104306	0.00197759	0.00806756	0.0153722	0.00695074	0.00232908	0.00635919
LPC 18:1	0.0855292	0.111777	0.108626	0.154843	0.15793	0.105173	0.00482044	0.00968844
LPC 18:0	0.0470284	0.0460213	0.0734651	0.158468	0.11953	0.0738381	0.00159761	0.00208976
LPC 20:6	0	0	6.44995e-05	0	0	0	0	0.000210368
LPC 20:5	0.00126993	0.00476957	0.00101679	0.00381571	0.00581247	0.00190346	0	0
LPC 20:4	0.0018042	0.00320575	0	0.00472272	0.00393583	0.00227403	0.00159299	0.000829669
LPC 20:3	0.000958154	0.00587609	0.000378667	0	0	0.00296698	0	0.000462777
LPC 20:2	0.00323922	0.00458776	0.00209492	0.00461641	0.00417358	0.00406779	0.00107539	0
LPC 20:1	0.0321868	0.0950924	0.0312851	0.136534	0.0721748	0.0882151	0.00290288	0.00735345
LPC 20:0	0.00526833	0.0105691	0.00634591	0.0102637	0.0148189	0.00702639	0.00100038	0.00146678
LPC 22:6	0.0011029	0.00280563	0.00133543	0.00331384	0	0.00247469	0.00104953	0
LPC 22:5	0.00089044	0.00300417	0.00132743	0.00338803	0	0.00252414	0	0.00177473
LPC 22:4	0.00159621	0.00250577	0	0.00271034	0.00339541	0.00172373	0.00135873	0
LPC 22:3	0.00130521	0.00148078	0	0.00410785	0.00312266	0.00249815	0.00136168	0.0013573
LPC 22:2	0.000878849	0.00393967	0.000935694	0.00347842	0.00144697	0.000951974	0	0
LPC 22:1	0.00702339	0.00512855	0.00510499	0.0125911	0.0125405	0.00624743	0	0
PA 32:2	0.00827344	0.0162872	0.0029855	0.0175119	0.00506964	0.00598278	0.00159208	0.000978883
PA 32:1	0.0210607	0.0168294	0.0221812	0.0684578	0.0523921	0.0380963	0.000110615	0
PA 32:0	0.0147529	0.035604	0.0283421	0.0658491	0.094339	0.0728262	0	0.000458439
PA O-34:2	0.00494682	0.016411	0.000723836	0	0	0	0	0
PA O-34:1	0.0127313	0.0146884	0.0263073	0.0413655	0.109982	0.0627583	0.000234942	0
PA 34:3	0.00436478	0.0137242	0.000678516	0	0.00344966	0.00216808	0	0
PA 34:2	0.0265516	0.0297531	0.0179576	0.0524825	0.0998296	0.0315526	0	0.00102748
PA 34:1	0.120413	0.101931	0.14931	0.309916	0.521433	0.225515	0.0100424	0.0128378
PA O-36:2	0.0130172	0.0202963	0.0165447	0.0202553	0.0359716	0.0248421	0.00244931	0.00231257
PA O-36:1	0.0320697	0.0224378	0.0302705	0.0544112	0.0690048	0.0351855	0	0
PA 36:4	0.0211404	0.00129185	0.00487434	0.0147299	0.0336896	0.00549264	0	0.000171284
PA 36:3	0.00922978	0.0143618	0.00764028	0.0165099	0.0368335	0.0123195	0	0.000994641
PA 36:2	0.158042	0.159088	0.123184	0.308914	0.508799	0.201129	0.00476344	0.0107079
PA 36:1	0.238917	0.156084	0.212733	0.327846	0.713661	0.341289	0.00267488	0.00915193
PA 38:6	0.00301661	0	0	0.00164872	0	0	0	0
PA 38:5	0.00351698	0.012673	0.00281455	0.00954369	0.00921981	0.00893502	0.00288026	0.000620447
PA 38:4	0.00808346	0.00440021	0.00488423	0.0217067	0.0128505	0.0141466	0.00135855	0.000817861
PA 38:3	0.0191768	0.0177322	0.00664011	0.0330446	0.0549986	0.0343048	0	0
PC O-30:2	0.000185305	0.0038529	0.00112774	0.00173823	0.00797	0.00456844	0	0
PC O-30:1	0.0197167	0.0375661	0.0127899	0.032987	0.0528601	0.0324698	0	0.00155028
PC O-30:0	0.113321	0.139025	0.11104	0.36322	0.405282	0.235064	0.00259435	0.00511958
PC 30:2	0	0	0.00464338	0	0.0107751	0	0	0.00166719
PC 30:1	0.067669	0.270235	0.0754757	0.0494391	0	0.332171	0.00932753	0.0149353
PC 30:0	0.393219	0.536663	0.400745	1.35035	1.27979	0.781454	0.00429232	0.0150698
PC O-32:2	0.0289316	0.0477359	0.0359106	0.0697307	0.0884685	0.0379031	0	0
PC O-32:1	0.406298	0.693221	0.43245	1.15603	1.50972	0.671045	0.00866918	0.0141019
PC O-32:0	0.637262	0.865989	0.700674	2.5379	3.03753	1.41131	0.0239285	0.0347733
PC 32:3	0.00230946	0.00189985	0.00423553	0.00489963	0	0.00562648	0	0
PC 32:2	0.0577941	0.079275	0.0480765	0.13115	0.155388	0.0682169	0.00172784	0.00382129
PC 32:1	1.24282	1.66567	1.13429	3.60172	3.61532	1.96114	0.0463869	0.0620043
PC 32:0	1.30301	1.58101	1.31802	5.56062	5.45681	3.27293	0.0370107	0.0450393
PC O-34:3	0.0172891	0.0265478	0.0226566	0.0346643	0.0559325	0.0268917	0	0.00299311
PC O-34:2	0.285485	0.434837	0.336079	0.504183	0.715681	0.339184	0.0132669	0.0195625
PC O-34:1	2.27641	3.51516	2.68799	4.84703	6.81387	3.32663	0.0705783	0.109427
PC O-34:0	0.373063	0.591004	0.624481	1.23921	1.54332	0.778677	0.0096107	0.0142239
PC 34:3	0.0210706	0.0498116	0.0212414	0.0340968	0.0445742	0.0274039	0.00155538	0.00319835
PC 34:2	0.588358	1.12041	0.604574	1.14441	1.33541	0.80335	0.0243916	0.0553121
PC 34:1	4.9925	6.37297	5.51628	11.02	12.1721	7.74702	0.116224	0.198103
PC 34:0	0.36919	0.337439	0.504086	1.5555	1.36562	1.08264	0.00579735	0.017011
PC O-36:6	0.0249706	0.0192812	0.0257549	0.03455	0.0256107	0.0285062	0.00239036	0.00129683
PC O-36:5	0.0132662	0.0166039	0.00987973	0.0236984	0.0242133	0.0138651	0.00134226	0.00260573
PC O-36:4	0.0161911	0.0215286	0.0183002	0.0288093	0.0320568	0.0192619	0	0.00129956
PC O-36:3	0.0809958	0.12371	0.10833	0.110622	0.221103	0.12537	0.00548005	0.00808187
PC O-36:2	0.613398	1.01732	0.846963	0.617602	0.99187	0.538013	0.0283145	0.0553099
PC O-36:1	0.583823	0.878978	1.00373	0.831784	1.27746	0.686503	0.0142836	0.0303642
PC O-36:0	0.0716601	0.0968638	0.147105	0.193339	0.249049	0.17823	0.00196661	0.000197135
PC 36:6	0.0144391	0.0103984	0.0107029	0.0106432	0.0218223	0.0143097	0.00277099	0.00214806
PC 36:5	0.00813244	0.0289715	0.00593893	0.0209451	0.0128717	0.00358724	0.00651104	0.00168799
PC 36:4	0.0181137	0.124928	0.0168145	0.0182906	0.026781	0.0167552	0.00143805	0.000650652
PC 36:3	0.0823047	0.140109	0.0779346	0.125575	0.116627	0.0843887	0.00461024	0.00836834
PC 36:2	2.16076	3.18703	2.60627	2.58514	3.55408	2.33061	0.074631	0.160074
PC 36:1	1.43922	2.21561	2.15375	2.37332	2.59674	1.99874	0.0400435	0.0648919
PC 36:0	0.0635135	0.0596327	0.0591227	0.132386	0.140734	0.109889	0	0.00217088
PC O-38:6	0.0225512	0.035495	0.0208616	0.0402339	0.0274277	0.0267887	0.00222422	0.00205394
PC O-38:5	0.066545	0.0715282	0.0458708	0.0930269	0.0861137	0.0321209	0.00332949	0.00404682
PC O-38:4	0.0267888	0.0387292	0.0283369	0.0255125	0.0327785	0.0292247	0	0.00301539
PC O-38:3	0.0318784	0.0570143	0.0380259	0.0411056	0.0621533	0.0467124	0.00252363	0.00362978
PC O-38:2	0.0944494	0.140513	0.0999131	0.0975306	0.156103	0.106023	0.00368998	0.0042297
PC O-38:1	0.064798	0.0966636	0.0882635	0.12748	0.194149	0.12779	0.00459296	0.00479734
PC 38:7	0.013256	0.0179809	0.0271622	0.0373631	0.0426402	0.040303	0.000183447	0.000420192
PC 38:6	0.00688463	0.00741602	0.00870232	0.00649857	0.00384095	0.00674187	0	0
PC 38:5	0.0129552	0.0147075	0.0106161	0.00640073	0.0121695	0.0112515	0	0.00100102
PC 38:4	0.0183393	0.0312893	0.0231847	0.0293722	0.0314983	0.036816	0.00102392	0.00111714
PC 38:3	0.0534574	0.0656189	0.0496929	0.109042	0.10465	0.0780433	0.0036462	0.00608254
PC 38:2	0.268412	0.496051	0.31044	0.237754	0.404336	0.249373	0.007906	0.0116105
PC 38:1	0.0838521	0.152232	0.123273	0.156482	0.188677	0.100422	0.00352838	0.000883516
PC 38:0	0.0257836	0.0192867	0.0245261	0.044079	0.058161	0.0331934	0.00330526	0.00301806
PC O-40:1	0	0.0282759	0	0.0570179	0.0883416	0.040132	0	0
PC 40:7	0.00896218	0.00990168	0.00871707	0.0142297	0.0347406	0.019149	0	0
PC 40:6	0.00492743	0.0115208	0.00593994	0.0134675	0.00753287	0.00685399	0.000449432	0.000895604
PC 40:5	0.00511469	0.00125505	0.00457641	0.00887505	0	0.00319131	0.00196894	0.00198053
PC 40:4	0.00690857	0.00178317	0.00696288	0.0125748	0.00863299	0.00653889	0	6.77276e-05
PE P-16:0/16:1	0.529775	0.658083	0.432285	1.30427	1.6593	0.946031	0.0139908	0.024346
PE P-16:0/18:2	0.396249	0.522767	0.310693	0.706963	0.912626	0.453489	0.00987522	0.0146332
PE P-16:0/18:1	4.57104	6.39973	5.23647	9.39726	12.846	7.89146	0.132668	0.224855
PE P-16:0/20:5	0.117355	0.153106	0.12741	0.437637	0.340429	0.304052	0.00529933	0.0154057
PE P-16:0/20:4	0.678859	0.789318	0.644006	2.18983	2.15773	1.60195	0.0167771	0.0341383
PE P-16:0/20:3	1.08825	1.572	0.771481	1.80527	2.30678	1.31034	0.0319908	0.04803
PE P-16:0/20:2	0.287059	0.43981	0.238874	0.539281	0.799987	0.428233	0.0120438	0.0116458
PE P-16:0/20:1	0.321658	0.464127	0.319131	0.882483	1.34313	0.857682	0.0112646	0.0158278
PE P-16:0/22:6	0.347299	0.36247	0.312889	1.21589	1.16704	1.01662	0.00789606	0.0143111
PE P-16:0/22:5	0.270208	0.29799	0.267605	0.896474	0.900429	0.772191	0.00522793	0.0117618
PE P-16:0/22:4	0.060791	0.0701155	0.0670273	0.181635	0.199187	0.156398	0.00361457	0.00246828
PE P-16:0/22:3	0.0639849	0.121013	0.0442351	0.136114	0.210263	0.145925	0.00416286	0.00293789
PE P-16:0/22:2	0.07145	0.0788322	0.0573954	0.147612	0.183023	0.0998898	0.00191853	0.00481215
PE P-16:0/22:1	0.0537707	0.0854541	0.042083	0.183084	0.264074	0.163532	0.00557887	0.00366708
PE P-16:0/24:6	0.00841654	0.00948154	0.00614187	0.0277753	0.0245915	0.0309396	0.0012459	0.00189354
PE P-16:0/24:5	0.00792386	0.00806438	0.00697494	0.0229375	0.0244345	0.0178052	0	0.00268979
PE P-16:0/24:4	0.00794559	0.0103242	0.0119077	0.0201569	0.0298252	0.0222341	0.00476043	0.00150792
PE P-18:0/16:1	0.46555	0.583963	0.487615	1.053	1.27581	0.723654	0.0125391	0.0194959
PE P-18:0/18:2	0.3304	0.404608	0.284676	0.5164	0.588414	0.330996	0.0114113	0.0110362
PE P-18:0/18:1	2.82948	3.91326	3.69623	4.61831	6.3868	4.38857	0.0754325	0.14077
PE P-18:0/20:5	0.114347	0.120483	0.10787	0.281916	0.274652	0.196916	0.00891197	0.00855418
PE P-18:0/20:4	0.58044	0.644442	0.708952	1.59472	1.38281	1.10042	0.0110345	0.0281967
PE P-18:0/20:3	0.828291	1.22262	0.70551	1.13442	1.44011	0.932507	0.0208609	0.0371948
PE P-18:0/20:2	0.226307	0.299854	0.234294	0.261577	0.363038	0.230497	0.00993123	0.0131622
PE P-18:0/20:1	0.20006	0.279444	0.180633	0.357855	0.554241	0.397731	0.0053216	0.00909711
PE P-18:0/22:6	0.3132	0.314603	0.371385	0.967833	0.832571	0.765775	0.0086155	0.0137242
PE P-18:0/22:5	0.241384	0.241196	0.286975	0.590595	0.586071	0.517384	0.0126695	0.0141712
PE P-18:0/22:4	0.039306	0.0331765	0.0408626	0.106319	0.0811413	0.0773843	0	0.00125257
PE P-18:0/22:3	0.0745464	0.100828	0.0550934	0.0786729	0.0791559	0.0657452	0.00364879	0.00641255
PE P-18:0/22:2	0.0588986	0.0738033	0.0664198	0.0716121	0.084723	0.0722739	0.00268372	0.00349328
PE P-18:0/24:6	0.0109671	0.0138383	0.0105052	0.014201	0.0222537	0.0158541	0.00369749	0
PE P-18:0/24:5	0.00890635	0.00945136	0.00758525	0.0273729	0.0162574	0.0182694	0.00376352	0.00327415
PE P-18:0/24:4	0.00207587	0.00594147	0.0247774	0.0282513	0.0480375	0.0196497	0.00123326	0
PE P-18:1/16:1	0.931417	1.2557	0.737736	2.24372	3.04954	1.62392	0.0159001	0.0376081
PE P-18:1/16:0	0.0915693	0.127671	0.0654033	0.680979	1.00523	0.702218	0.00416153	0.00786269
PE P-18:1/18:2	0.505326	0.700793	0.350585	0.741385	1.02208	0.477444	0.009917	0.0174995
PE P-18:1/18:1	7.343	10.4567	6.5565	11.4023	15.8546	9.24607	0.178693	0.259287
PE P-18:1/18:0	0	0	0	0	0	0.0143893	0.00114354	0.00574544
PE P-18:1/20:5	0.160705	0.168341	0.127134	0.36981	0.4003	0.276397	0.00695144	0.0143669
PE P-18:1/20:4	0.929252	1.07898	0.660542	2.21589	2.18256	1.52023	0.0170591	0.0256392
PE P-18:1/20:3	1.44096	2.01755	0.806975	1.91337	2.53889	1.31183	0.0293799	0.0464145
PE P-18:1/20:2	0.355263	0.543843	0.231757	0.422487	0.661374	0.385146	0.0102897	0.0146087
PE P-18:1/20:1	0.382754	0.589267	0.288645	0.595232	0.949406	0.624021	0.0101237	0.0143083
PE P-18:1/20:0	0.0112662	0.00298508	0.00760231	0.0321148	0.0622472	0.0561666	0	0.0031783
PE P-18:1/22:6	0.513662	0.514521	0.384289	1.48588	1.35665	1.12187	0.0153198	0.0148694
PE P-18:1/22:5	0.331517	0.362117	0.257185	0.876065	0.878042	0.686719	0.00917747	0.0102107
PE P-18:1/22:4	0.0625597	0.074532	0.0484187	0.132797	0.176595	0.142413	0.00115339	0
PE P-18:1/22:3	0.102946	0.116879	0.0437636	0.105323	0.145432	0.095813	0.00182758	0.000346705
PE P-18:1/22:2	0.0693141	0.109784	0.0398686	0.112609	0.16249	0.0874117	0.00234072	0.00339438
PE P-18:1/24:6	0.00923899	0.0115397	0.0125251	0.0184514	0.0346705	0.0203773	0	0.00184442
PE P-18:1/24:5	0.00478885	0.00346121	0.0086273	0.0192796	0.0101074	0.00997733	0	7.20496e-05
PE P-18:1/24:4	0.0106297	0.031768	0.0164274	0.0398499	0.0633446	0.0179961	0.00448717	0.00623985
PE 32:2	0.0274378	0.0668108	0.0391913	0.142111	0.116201	0.0909453	0	0.00577671
PE 32:1	0.0783871	0.0863697	0.097586	0.318623	0.352169	0.176722	0.00967026	0.0131732
PE O-34:3	0.129198	0.155022	0.12416	0.310105	0.474201	0.240028	0.00376851	0.0057242
PE O-34:2	0.608526	0.698143	0.790747	1.21514	1.88248	1.11189	0.0227481	0.0423275
PE O-34:1	0.698529	0.947975	1.32811	1.10039	1.79453	1.02141	0.0239966	0.0537005
PE 34:2	0.539726	0.817599	0.557725	1.93799	2.46895	1.49593	0.0222881	0.031439
PE 34:1	0.471121	0.6196	0.641069	1.76011	2.10928	1.43922	0.0244143	0.0257368
PE O-36:6	0.0228472	0.0224252	0.019878	0.0613339	0.0753131	0.039271	0	0.00265493
PE O-36:5	0.104604	0.116641	0.10289	0.299499	0.30195	0.189813	0.00356296	0.00483143
PE O-36:4	0.240684	0.268524	0.231572	0.396979	0.501748	0.276032	0.00354274	0.013549
PE O-36:3	0.864181	1.13524	0.85898	1.23793	1.98769	1.09799	0.0235755	0.0293815
PE O-36:2	1.33796	1.99077	1.84389	1.50593	2.66581	1.41405	0.0349023	0.0807558
PE O-36:1	0.696536	1.02707	1.83235	1.01107	1.47275	0.797057	0.0233157	0.0418312
PE 36:5	0.0229732	0.0144491	0.0219442	0.0528031	0.0378917	0.0376278	0	0.00215314
PE 36:4	0.0645138	0.0883851	0.0441321	0.139117	0.160911	0.104448	0.00568703	0.00472216
PE 36:3	0.208251	0.272047	0.188401	0.719742	0.756008	0.429744	0.00365879	0.0125512
PE 36:2	2.63505	3.98227	2.90119	8.35734	10.114	7.2134	0.0798529	0.124276
PE 36:1	0.408527	0.500299	0.789647	1.4409	1.72836	1.39309	0.0314087	0.0367377
PE 36:0	0.0570522	0.0816008	0.0817583	0.208379	0.26822	0.177648	0.00366542	0
PE O-38:6	0.178945	0.219502	0.196828	0.385018	0.449202	0.299786	0	0.00711708
PE O-38:5	0.314764	0.424201	0.288509	0.512839	0.517123	0.31731	0.00414188	0.00861243
PE O-38:4	0.337997	0.430969	0.306948	0.351389	0.493492	0.235872	0.00523896	0.0133419
PE O-38:3	0.272151	0.429203	0.308107	0.246567	0.434166	0.229791	0.00992628	0.0135971
PE O-38:2	0.261159	0.418626	0.26686	0.268204	0.551161	0.312808	0.00280086	0.0125266
PE O-38:1	0.131611	0.124816	0.235272	0.223032	0.296289	0.212545	0.00273667	0.00880233
PE O-38:0	0.013528	0.00494315	0.0150058	0.00137284	0.0192658	0.0222592	0	0.000172452
PE 38:6	0.0259975	0.0425415	0.0274211	0.0823494	0.0623602	0.0513194	0.00500185	0
PE 38:5	0.0862055	0.0817843	0.0840524	0.227873	0.22228	0.173913	0.00404259	0.00659491
PE 38:4	0.21936	0.287587	0.146479	0.419278	0.461263	0.312244	0.00380941	0.0164001
PE 38:3	0.170395	0.245616	0.133769	0.375486	0.374807	0.277468	0.00646887	0.00500452
PE 38:2	0.174317	0.219114	0.176399	0.41216	0.459022	0.412626	0.00733147	0.00595077
PE 38:1	0.0555574	0.0871141	0.0809352	0.233767	0.243115	0.142525	0.00308333	0.00363766
PE 38:0	0.0852708	0.100454	0.0877875	0.171045	0.243077	0.150125	0.00411111	0.00677871
PE O-40:6	0.0910797	0.119997	0.134052	0.159786	0.139828	0.120318	0.000761343	0.000292533
PE O-40:5	0.0691969	0.0741928	0.0716174	0.093968	0.0883271	0.0601253	0	0.00138293
PE O-40:4	0.0544196	0.0783206	0.043481	0.055534	0.12938	0.0363205	0	0.00362357
PE O-40:3	0.0636635	0.0988861	0.0591687	0.0590973	0.107809	0.0509396	0.00417962	0
PE O-40:2	0.0632845	0.0959101	0.0573199	0.0815258	0.119575	0.0754965	0.00465925	0.00235148
PE O-40:1	0.020503	0.0207682	0.0478569	0.0272202	0.060915	0.040259	0	0.00135609
PE 40:7	0.0212372	0.0192455	0.0204458	0.102975	0.0916239	0.0529648	0	0.00273081
PE 40:6	0.0354925	0.0284206	0.0396317	0.101799	0.0845958	0.0861336	0	0.0064069
PE 40:5	0.0277428	0.0238939	0.0319168	0.0844601	0.0677005	0.071023	0.00308333	0.00367609
PE 40:4	0.0291761	0.043974	0.0279829	0.0591874	0.05139	0.036575	0	0.00262578
PE 40:3	0.0361825	0.0475363	0.0236227	0.0413401	0.0722455	0.0327538	0	0
PG 30:1	0.000129313	0.00554206	0	0	0	0	0	0
PG 30:0	0.00456668	0.0301691	0.00260243	0.00540476	0.0154413	0.00435921	0.00776712	0.00297469
PG O-32:1	0	0.0091209	0	0	0.00718556	0	0	0
PG O-32:0	0.00266884	0.00818543	0.00280745	0	0	0.00370533	0	0
PG 32:2	0.00225369	0.00596367	0.00223556	0.00690658	0	0.00341472	0	0.0023035
PG 32:1	0.00687235	0.00505105	0.00624686	0.0537742	0.0331271	0.0158919	0.0110134	0.0111137
PG 32:0	0.00480024	0.0192973	0.00833755	0	0.00794514	0	0.00228042	0
PG O-34:2	0.000511672	0	0	0	0	0	0	0
PG O-34:1	0.00616799	0.0132136	0.00796691	0.0240845	0.00664512	0.00653882	0.00443836	0.00195444
PG O-34:0	0.0047446	0.0109458	0.00432829	0.00333794	0.00435414	0.00530371	0	0.0013972
PG 34:3	0.00290607	0.00795156	0	0	0	0	0	0
PG 34:2	0.0140854	0.043032	0.0227331	0.0883688	0.0212509	0.00806455	0.00282945	0.00487133
PG 34:1	0.0893117	0.0728621	0.0867283	0.501773	0.0424722	0.0136514	0.0051444	0.00925725
PG 34:0	0.0133363	0.0207846	0.0250073	0.000239852	0.00968745	0.00319192	0.00158341	0.0012242
PG O-36:2	0	0.00689914	0.00410719	0.0223926	0	0.00319007	0	0
PG O-36:1	0.00737646	0.00880286	0.00659602	0.0621181	0.00233733	0	0.000512303	0
PG 36:4	0	0	0	0.00681804	0	0	0	0
PG 36:3	0.00308399	0.00363242	0.0075905	0.0204987	0	0.0029788	0	0
PG 36:2	0.072263	0.0762202	0.12191	0.507684	0.0488866	0.0386	0.00699256	0.00952922
PG 36:1	0.0928435	0.0815134	0.209436	1.1128	0.0711556	0.0460966	0.0074606	0.00947681
PG 38:6	0	0	0.0030154	0.0042502	0	0.00170675	0	0
PG 38:5	0.00379568	0.00701608	0.0025475	0.0103599	0	0.00399595	0	0
PG 38:4	0.00403291	0	0.00337933	0.0312535	0	0	0	0
PG 38:3	0.00383865	0.00806849	0.00903623	0.044717	0	0	0	0.00211469
PG 38:2	0.00543568	0.0084193	0.00593214	0.0635126	0.00963171	0.00443187	0	0.00256783
PI 32:2	0.00396927	0	0	0	0	0	0	0
PI 32:1	0.00816536	0.692156	0.00673103	0.0119737	0.020429	0.00743726	0	0
PI 32:0	0.00827877	0.0588751	0.00798749	0.0136065	0	0	0	0
PI 34:2	0.0220011	0.145245	0.0307832	0.0476227	0.0471117	0.0269007	0.00841034	0.00704738
PI 34:1	0.0689519	0.135383	0.101773	0.0854487	0.0871358	0.0875065	0.00630775	0.0105133
PI 34:0	0.0102067	0.0310813	0.0228855	0.0195933	0.0416918	0.0075955	0	0.00716291
PI O-36:3	0	0.0140463	0.00933369	0	0	0.00965262	0	0
PI O-36:2	0.0209804	0.0508059	0.0186674	0.0250359	0	0.0156657	0	0
PI O-36:1	0.0206402	0.0388516	0.0423606	0.014695	0	0.00807022	0	0
PI 36:4	0.00576183	0.0165191	0.00586036	0.00725863	0.00544738	0.00713705	0	0
PI 36:3	0.0481983	0.0756111	0.0452325	0.0244917	0.040441	0.038927	0	0.00566101
PI 36:2	0.296335	0.458449	0.462377	0.271041	0.475286	0.304928	0.0110386	0.0336195
PI 36:1	0.29418	0.38224	0.73799	0.366287	0.640802	0.383573	0.0189233	0.033735
PI O-38:2	0.044229	0.0373573	0.0320397	0.0176884	0.0371057	0.0137668	0	0.00820269
PI 38:5	0.0214341	0	0.0351808	0.0361932	0.0300181	0.0180393	0.00446799	0
PI 38:4	0.181452	0.197844	0.218444	0.127629	0.142586	0.126433	0.0124841	0.0190626
PI 38:3	0.556226	0.748444	0.523759	0.224343	0.436662	0.254308	0.0270356	0.0363543
PI 38:2	0.246662	0.364607	0.310525	0.13797	0.26099	0.0949438	0.013404	0.0273808
PI O-40:4	0.00529219	0	0.000480062	0	0.00380339	0	0	0
PI O-40:3	0.0138357	0.0173338	0.0123851	0	0.020012	0.00933614	0	0
PI 40:6	0.00827877	0	0.0143595	0	0.025432	0.0110768	0	0
PI 40:5	0.0125883	0	0.0222573	0.0138786	0.0183444	0.00901966	0	0
PI 40:4	0.0108871	0.0143452	0.0124748	0.0182327	0	0.0083867	0	0
PI 40:3	0.0173514	0.0218167	0.014898	0.0100688	0	0.0162987	0	0
PI 40:2	0.00941285	0.0277938	0.0154365	0	0.0245981	0.00775374	0	0
PS 32:3	0	0	0	0	0.00525221	0.0036715	0	0.00202998
PS 32:2	0.00679838	0.0142492	0.00154489	0.0185042	0.0115049	0.00679261	0	0
PS 32:1	0.108177	0.114609	0.0843953	0.599162	0.507354	0.278251	0.00541385	0.0049185
PS O-34:2	0.010953	0	0.0108958	0.0324272	0.0529112	0.0139176	0	0
PS O-34:1	0.103434	0.107824	0.0875829	0.288205	0.304687	0.140815	0.00354271	0.0059338
PS 34:2	0.282757	0.40107	0.247487	0.838915	1.02352	0.503299	0.00964508	0.00600304
PS 34:1	1.31153	1.79931	1.45578	4.29557	5.24129	3.01367	0.0354994	0.053374
PS 34:0	0.000529266	0	0.0035561	0.0790274	0.036025	0.0120546	0.00247385	0.00172385
PS O-36:2	0.0860501	0.127669	0.0799937	0.209724	0.267461	0.128623	0	0
PS O-36:1	0.311541	0.36459	0.343459	0.596172	0.747121	0.418642	0.00802533	0.0207162
PS 36:4	0.0128655	0.0146864	0.0136542	0.077636	0.0497988	0.0287577	0	0
PS 36:3	0.0897104	0.123068	0.0672586	0.213992	0.28089	0.195616	0	0.00515303
PS 36:2	2.23595	2.88542	2.19705	4.18003	5.58055	3.49212	0.0581294	0.0712011
PS 36:1	4.47176	5.34874	5.16822	7.74366	10.4559	7.37071	0.116979	0.17486
PS 36:0	0	0	0	0	0	0	0.00201219	0
PS O-38:3	0.0163264	0.0349499	0.0151713	0.0440253	0.0453247	0.0228746	0	0.00202998
PS O-38:2	0.0468798	0.0603116	0.0450831	0.0962529	0.0852531	0.0758075	0	0
PS O-38:1	0.0461906	0.0635358	0.0462017	0.119136	0.140598	0.0853074	0	0.00349745
PS 38:7	0.00437032	0.00200341	0	0.00218579	0	0	0	0
PS 38:6	0.0107589	0.0104106	0.00427556	0.0321905	0.0149785	0.018545	0	0.00150947
PS 38:5	0.0381451	0.058002	0.0261684	0.0842505	0.0941508	0.0665994	0	0
PS 38:4	0.0833684	0.134503	0.103053	0.277649	0.285669	0.182992	0.00397651	0.00463252
PS 38:3	0.198959	0.284777	0.183948	0.395651	0.534049	0.365615	0.00751923	0.00565119
PS 38:2	0.395426	0.479374	0.339595	0.460906	0.770542	0.485277	0.00751923	0.0118676
PS 38:1	0.199263	0.222555	0.241588	0.179617	0.336209	0.275967	0.00625422	0.00570496
PS 38:0	0.00396954	0.00764998	0.000554948	0	0.00597552	0.00816565	0.00147709	0
PS O-40:2	0.0154914	0.0269815	0.0142575	0.0194336	0.0431574	0.0231013	0	0
PS O-40:1	0.010986	0.0178468	0.0180026	0	0.0440746	0.0139172	0	0
PS O-40:0	0.0148735	0.0367905	0.015084	0.0436918	0.0577719	0.0552019	0	0
PS 40:6	0.123404	0.133423	0.149503	0.393751	0.328881	0.309751	0.00375961	0.00452842
PS 40:5	0.135876	0.156533	0.165936	0.376913	0.323792	0.302691	0.00361501	0.0022022
PS 40:4	0.0514612	0.0673904	0.0584088	0.107902	0.116793	0.110154	0	0.00235899
PS 40:3	0.0709612	0.146565	0.0463943	0.0927381	0.148382	0.0979306	0	0.00447637
PS 40:1	0.189793	0.281461	0.295471	0.176578	0.480582	0.312575	0.0154681	0.00737578
PS O-42:3	0.00737321	0	0.00397424	0.00852103	0.00288731	0.0063184	0	0
PS O-42:2	0.0128351	0.015876	0.0095249	0.0199992	0.0342688	0.0173686	0	0
PS O-42:1	0.0164402	0.0254499	0.0240223	0.0311802	0.0616252	0.0376394	0	0.00270664
PS O-42:0	0.0116214	0.0112933	0.00644004	0.0166251	0.014592	0.011409	0	0
PS 42:6	0.00639513	0.0210071	0.0031629	0.02301	0.0190636	0.0179886	0	0
PS 42:5	0.00909016	0.00376083	0.00528667	0.00710098	0.00852746	0.0149379	0	0.00202998
PS 42:4	0.00981575	0.0103656	0.00803238	0.00888137	0.0286393	0.0101589	0	0
PS 42:2	0.152471	0.186369	0.147093	0.20007	0.435575	0.244022	0.00686852	0.00728712
PS 42:1	0.182922	0.281705	0.258749	0.26769	0.621304	0.345294	0.00366963	0.0105131
SM 34:2;2	0.651617	1.64609	0.772541	3.07684	3.95225	2.10798	0.0212613	0.0348857
SM 34:1;2	7.66919	16.0782	11.8086	37.181	45.2962	26.9473	0.354545	0.513999
SM 34:0;2	1.07092	1.84565	2.87031	4.06071	3.44039	1.74527	0.0428177	0.0412362
SM 36:2;2	0.0170831	0.0498088	0.0252511	0.0863485	0.0920393	0.0725377	0.00247195	0.0019286
SM 36:1;2	0.0905549	0.216346	0.184684	0.410918	0.493881	0.325868	0.00141191	0.00559611
SM 36:0;2	0	0	0	0	0	0	0	0
SM 38:2;2	0.0065021	0.0249307	0.00958637	0.0308239	0.0458148	0.0268642	0	0
SM 38:1;2	0.0270338	0	0.0310854	0.153113	0.136146	0.0737228	0	0.00393912
SM 38:0;2	0.0233662	0	0	0	0	0	0.00207739	0
SM 40:2;2	0.0434476	0.125705	0.0808559	0.265417	0.314093	0.158772	0.000226683	0.00316907
SM 40:1;2	0.0477465	0.190524	0.186491	0.806418	0.953781	0.822996	0.00650227	0.0142054
SM 40:0;2	0	0	0	0	0	0	0.00861581	0
SM 42:3;2	0.139987	0.358862	0.155106	0.58944	0.739405	0.412136	0.00688443	0.0098565
SM 42:2;2	0.846611	1.90167	1.12757	4.09791	5.21615	3.28493	0.0433034	0.0482677
SM 42:1;2	0.247179	0.392895	0.443067	1.86057	2.11944	1.45576	0.00852083	0.0213133
SM 42:0;2	0.00964528	0	0.0539763	0.0226912	0.0394683	0.0626978	0	0
DAG 30:4	0.00162923	0.00312287	0.00197831	0.00515956	0.00637637	0.00333925	0.000968493	0.000762058
DAG 31:1	0.00170807	0.00620516	0.00315161	0.0106219	0.01542	0.00785865	0.00643825	0.00392615
DAG 32:4	0.00232246	0.00578826	0.00304427	0.00784513	0.00996554	0.00705036	0	0.0019612
DAG 32:1	0.00506512	0.0136842	0.0185456	0.0135458	0.0216012	0.0130344	0.00755358	0.00371769
DAG 34:4	0.00233334	0.00352665	0.00296537	0.00608568	0.00835056	0.00381586	0.000632312	0.00137608
DAG 34:3	0.0737294	0.0526375	0.0747881	0.0627985	0.107637	0.0848334	0.0138247	0.0217635
DAG 34:1	0.0325499	0.0426824	0.119741	0.0452484	0.0439966	0.0408919	0.0101896	0.00924898
DAG 36:2	0.0356864	0.0564089	0.125135	0.048853	0.060465	0.0489426	0.0192809	0.0153793
DAG 36:1	0.0192917	0.0322887	0.0974573	0.0388318	0.0302244	0.0300224	0.00274586	0.00554158
DAG 36:0	0.046247	0.062678	0.0760875	0.091774	0.0862209	0.0761041	0.00633895	0.0169118
DAG 38:4	0.0401644	0.043987	0.0532852	0.0606044	0.0670771	0.0481981	0.0109162	0.0143236
DAG 38:3	0.127266	0.108264	0.137528	0.10578	0.139588	0.116537	0.0159389	0.0332885
DAG 38:2	0.0163021	0.0325434	0.0498074	0.0236344	0.0224286	0.0185547	0.00251742	0.0052385
DAG 38:1	0.0217863	0.0696764	0.00513411	0.0442621	0.020172	0.0150971	0.00437277	0.00428094
TAG 52:6	0.00692401	0.00148287	0	0.00526577	0.00408326	0.00202977	0.00170731	0
TAG 52:5	0.0209288	0	0	0	0.0176298	0	0.00521156	0
TAG 52:4	0.0385962	0.00190135	0	0	0.00923249	0	0.0368666	0
TAG 52:1	0.0222273	0.00588302	0.00871296	0	0	0	0.00526333	7.79855e-05
TAG 54:6	0.0325036	0.00502522	0	0	0.00448749	0	0.0984339	0.00045009
TAG 54:5	0.0643547	0.000762368	0	0	0.0253634	0.00217661	0.128878	0.00019113
TAG 54:1	0.0138873	0.0038988	0.000959002	0	0	0	0.0176966	0
