# Supplementary material for: Glucosylceramide in bunyavirus particles is essential for virus binding to host cells
Source: Cell Mol Life Sci. 2024 Feb 1;81(1):71. doi: 10.1007/s00018-023-05103-0 (PMC10834583; doi:10.1007/s00018-023-05103-0)
Supplement: Supplementary file 4 — Supplementary file4 Supplemental Table S4. Lipidomic analysis of purified Uukuniemi virus (UUKV) particles produced in the presence of PPMP. This table is related to Figure 3E (XLSX 30 KB) [file 18_2023_5103_MOESM4_ESM.xlsx]

## Sheet: Table S4 (Fig. 3E)
Values in [µM]
Lipid	UUKV (produced in 0 µM PPMP)	UUKV (produced in 2.5 µM PPMP)
PC O-30:2	0.000483974	0.000543232
PC O-30:1	0.00313092	0.00235444
PC O-30:0	0.0255282	0.0141579
PC 30:2	0	0
PC 30:1	0.00580057	0.00433996
PC 30:0	0.0733612	0.0388949
PC O-32:2	0.00662021	0.00411095
PC O-32:1	0.116729	0.0631973
PC O-32:0	0.184667	0.117079
PC 32:3	0.000618784	0.000515694
PC 32:2	0.0113252	0.00946098
PC 32:1	0.225237	0.131123
PC 32:0	0.293655	0.16266
PC O-34:3	0.00360173	0.00186935
PC O-34:2	0.0652868	0.0330736
PC O-34:1	0.588927	0.313757
PC O-34:0	0.0906923	0.062814
PC 34:3	0.00363977	0.00222249
PC 34:2	0.126106	0.0863215
PC 34:1	0.945719	0.488216
PC 34:0	0.057549	0.0354448
PC O-36:6	0.00390956	0.00121033
PC O-36:5	0.00122552	0.000910651
PC O-36:4	0.00295956	0.00196055
PC O-36:3	0.017622	0.00917686
PC O-36:2	0.127918	0.0634273
PC O-36:1	0.112216	0.0588612
PC O-36:0	0.0155826	0.00847719
PC 36:6	0.00165922	0.00017305
PC 36:5	0.000897128	0.00047921
PC 36:4	0.00200174	0.00119178
PC 36:3	0.0139739	0.00980946
PC 36:2	0.452621	0.247262
PC 36:1	0.288528	0.146546
PC 36:0	0.00785635	0.00655491
PC O-38:6	0.00308111	0.00154373
PC O-38:5	0.00611786	0.00245203
PC O-38:4	0.00489257	0.0020261
PC O-38:3	0.00668816	0.00314632
PC O-38:2	0.0221908	0.00974164
PC O-38:1	0.0199513	0.00943269
PC 38:7	0.00384146	0.00175322
PC 38:6	0.000756762	0.000312034
PC 38:5	0.00117289	0.00138515
PC 38:4	0.00423107	0.00236248
PC 38:3	0.0118239	0.00609665
PC 38:2	0.0693944	0.0309308
PC 38:1	0.019578	0.00938603
PC 38:0	0.00399887	0.00294226
PC O-40:1	0.00642909	0.00193287
PC 40:7	0.0012539	0.00164657
PC 40:6	0.00100603	0.000870172
PC 40:5	0	0.000500759
PC 40:4	0.00131268	0.000635629
SM 34:2;2	0.263062	0.207953
SM 34:1;2	2.58224	1.84026
SM 34:0;2	0.263081	0.120949
SM 36:2;2	0.00636323	0.00351698
SM 36:1;2	0.0247785	0.015309
SM 36:0;2	0.00213177	0.00586493
SM 38:2;2	0.000867325	0.00140483
SM 38:1;2	0.00269654	0
SM 38:0;2	0	0
SM 40:2;2	0.0145163	0.0119134
SM 40:1;2	0.0103477	0.024163
SM 40:0;2	0	0
SM 42:3;2	0.0514933	0.0417
SM 42:2;2	0.325785	0.251314
SM 42:1;2	0.0752015	0.096544
SM 42:0;2	0	0.00226413
PE 32:2	0.0101263	0.0109341
PE 32:1	0.0153275	0.0166982
PE O-34:3	0.0408547	0.0233006
PE O-34:2	0.189949	0.0967969
PE O-34:1	0.118588	0.0624889
PE 34:2	0.164627	0.139014
PE 34:1	0.10291	0.0700441
PE O-36:6	0.00554019	0.00432084
PE O-36:5	0.0283644	0.0174692
PE O-36:4	0.0576373	0.0357133
PE O-36:3	0.231403	0.12661
PE O-36:2	0.272576	0.144021
PE O-36:1	0.0985647	0.0530845
PE 36:5	0.00444894	0.00308266
PE 36:4	0.0179098	0.00976698
PE 36:3	0.0588355	0.0431649
PE 36:2	0.785501	0.513042
PE 36:1	0.0956323	0.0686112
PE 36:0	0.0206566	0.0102167
PE O-38:6	0.0422934	0.0244254
PE O-38:5	0.0688619	0.0358416
PE O-38:4	0.0578297	0.028202
PE O-38:3	0.0532995	0.025404
PE O-38:2	0.0624056	0.0280022
PE O-38:1	0.0231847	0.0126141
PE O-38:0	0.00226211	0.000800146
PE 38:6	0.00548363	0.00363214
PE 38:5	0.0179812	0.0129134
PE 38:4	0.0509025	0.039449
PE 38:3	0.0414701	0.0215596
PE 38:2	0.0444044	0.0210193
PE 38:1	0.016695	0.00863771
PE 38:0	0.0218594	0.00907723
PE O-40:6	0.0145732	0.00850818
PE O-40:5	0.00807522	0.00520531
PE O-40:4	0.0105233	0.00487788
PE O-40:3	0.0121836	0.00471277
PE O-40:2	0.0116268	0.00518082
PE O-40:1	0.00564	0.00137591
PE 40:7	0.00364625	0.00392205
PE 40:6	0.00855428	0.00451055
PE 40:5	0.00620801	0.00602514
PE 40:4	0.00774851	0.00379017
PE 40:3	0.00831537	0.00642393
PS 32:3	0	0
PS 32:2	0.00132286	0.000731288
PS 32:1	0.0131749	0.0108511
PS O-34:2	0.00279271	0.00168759
PS O-34:1	0.0132247	0.007784
PS 34:2	0.0490092	0.0332778
PS 34:1	0.211024	0.136369
PS 34:0	0.000459316	0
PS O-36:2	0.015086	0.00780509
PS O-36:1	0.0383736	0.0197818
PS 36:4	0.00268896	0.00187744
PS 36:3	0.0171458	0.00961725
PS 36:2	0.390195	0.215974
PS 36:1	0.742138	0.357948
PS 36:0	0	0
PS O-38:3	0.00140496	0.000938175
PS O-38:2	0.00939978	0.0038488
PS O-38:1	0.00796511	0.00403743
PS 38:7	0.000821479	0
PS 38:6	0.00144391	0.000590656
PS 38:5	0.00301493	0.00296031
PS 38:4	0.0143447	0.00732952
PS 38:3	0.0350069	0.0153131
PS 38:2	0.0659636	0.0315094
PS 38:1	0.0349751	0.0129596
PS 38:0	0	0
PS O-40:2	0.00332556	0.00125148
PS O-40:1	0.00206723	0.00095846
PS O-40:0	0.00471766	0.00202511
PS 40:6	0.0234116	0.0129287
PS 40:5	0.0209697	0.011932
PS 40:4	0.00837253	0.00342613
PS 40:3	0.0159114	0.00581972
PS 40:1	0.0436192	0.0223409
PS O-42:3	0.000895186	0.000492213
PS O-42:2	0.00342388	0.00192495
PS O-42:1	0.00401792	0.0022643
PS O-42:0	0.000694156	0.000266137
PS 42:6	0.00216603	0.000424174
PS 42:5	0.00185158	0
PS 42:4	0.00235596	0.00112401
PS 42:2	0.0540482	0.0241863
PS 42:1	0.050459	0.0284645
PI 32:2	0.000843631	0.000979676
PI 32:1	0.000917634	0.00165698
PI 32:0	0.00192407	0.000858728
PI 34:2	0.00478057	0.00223753
PI 34:1	0.0120328	0.0060111
PI 34:0	0.00220528	0.000955486
PI O-36:3	0.00189447	0.000907107
PI O-36:2	0.0027529	0.00283017
PI O-36:1	0.0026049	0.00204401
PI 36:4	0.00109699	0.000376149
PI 36:3	0.0080663	0.0039187
PI 36:2	0.0494634	0.0397071
PI 36:1	0.064634	0.0564463
PI O-38:2	0.0062947	0.00539279
PI 38:5	0.00368561	0.00356185
PI 38:4	0.026863	0.0224721
PI 38:3	0.110989	0.0629162
PI 38:2	0.0581365	0.0359577
PI O-40:4	0.00153926	0.00126995
PI O-40:3	0.00196847	0.00128204
PI 40:6	0.00156886	0.00131833
PI 40:5	0.00341893	0.00252781
PI 40:4	0.00300451	0.0020803
PI 40:3	0.0028565	0.00241895
PI 40:2	0	0
PG 30:1	0.000458817	0.000157464
PG 30:0	0.000157358	0.000116614
PG O-32:1	0	0
PG O-32:0	0	0.000109867
PG 32:2	0.000648079	0
PG 32:1	0.000393202	0.000800355
PG 32:0	0.000355054	0.000126513
PG O-34:2	0	0
PG O-34:1	0.000315436	0.000638383
PG O-34:0	0	0.000228938
PG 34:3	0.000326907	0.00031699
PG 34:2	0.00105528	0.00198119
PG 34:1	0.00299392	0.00772118
PG 34:0	0	0.000736252
PG O-36:2	0.000281025	0
PG O-36:1	0.000870334	0.000761658
PG 36:4	0	0.000198119
PG 36:3	0.000349848	0.000396594
PG 36:2	0.00418572	0.00937576
PG 36:1	0.00458966	0.0119509
PG 38:6	0	0
PG 38:5	0.000395729	0
PG 38:4	0.00019914	0
PG 38:3	0.00037184	0.000617871
PG 38:2	0.000785222	0.00101703
PA 32:2	8.0645e-05	0.000274072
PA 32:1	0.00204971	0.00135453
PA 32:0	0	0
PA O-34:2	0.000479441	0.000538442
PA O-34:1	0.00286294	0.00204261
PA 34:3	0.000756688	0.000316264
PA 34:2	0.00229385	0.00228782
PA 34:1	0.00920937	0.00713778
PA O-36:2	0.00173021	0.00128348
PA O-36:1	0.00209799	0.00118683
PA 36:4	0.000251447	0.000267365
PA 36:3	0.00076623	0.000442468
PA 36:2	0.00888738	0.00961601
PA 36:1	0.0109934	0.0114194
PA 38:6	0.000106656	0.000252052
PA 38:5	0	0.000310924
PA 38:4	0.000268686	0.000416051
PA 38:3	0.00190702	0.00142939
LPC 14:1	0	4.46076e-05
LPC 14:0	0.0012418	0.000465633
LPC 16:1	0.0017553	0.00157381
LPC 16:0	0.00695736	0.00248567
LPC 18:3	0.000826272	0.000331406
LPC 18:2	0.000853567	0.000187876
LPC 18:1	0.010462	0.00565889
LPC 18:0	0.00497429	0.0037238
LPC 20:6	0.000694218	0.000346541
LPC 20:5	0.000929237	0.000249581
LPC 20:4	0.0001988	0
LPC 20:3	0.000818828	0.00037696
LPC 20:2	0.000380722	0
LPC 20:1	0.00318949	0.00100566
LPC 20:0	0.000947942	0.00070844
LPC 22:6	5.54269e-05	0.000210525
LPC 22:5	0.000565863	9.13882e-06
LPC 22:4	1.04506e-05	5.70818e-06
LPC 22:3	0.000943968	0.000420415
LPC 22:2	0.00052358	0
LPC 22:1	0.002102	0.000876783
Cer 34:1;2	0.0319158	0.0314823
Cer 36:1;2	0.000529613	0.000360201
Cer 38:1;2	0.000293734	0.000185264
Cer 40:2;2	0	0.000130113
Cer 40:1;2	0.000736194	0.000859071
Cer 40:2;3	0.000394917	0.000191223
Cer 42:2;2	0.00304457	0.00313757
Cer 42:1;2	0.00156772	0.00211666
HexCer 34:1;2	0.381527	0.0168407
HexCer 36:1;2	0.00690155	0.00015968
HexCer 38:1;2	0.00243559	0.000244964
HexCer 38:2;3	0.000410273	7.58724e-05
HexCer 40:2;2	0.00143932	0
HexCer 40:1;2	0.0171731	0.000709984
HexCer 40:3;3	0.000795116	9.41083e-05
HexCer 40:2;3	0.00177832	0.000150444
HexCer 40:1;3	0.000396519	0
HexCer 42:3;2	0.000461207	0
HexCer 42:2;2	0.0479712	0.00243117
HexCer 42:1;2	0.0296737	0.00236498
HexCer 42:3;3	0	0
HexCer 42:2;3	0.000792456	5.36663e-05
HexCer 42:1;3	0	0
Hex2Cer 32:1;2	0.00138946	0
Hex2Cer 34:1;2	0.136971	0.0137726
Hex2Cer 36:1;2	0.00451664	0
Hex2Cer 36:1;3	0	0
Hex2Cer 38:1;2	0.00197603	0.0010582
Hex2Cer 38:2;3	0.00167358	0
Hex2Cer 40:1;2	0.00909377	0.00198814
Hex2Cer 40:2;3	0.00160619	0.000318009
Hex2Cer 40:1;3	0.00183488	0.000785634
Hex2Cer 42:2;2	0.0338143	0.00530704
Hex2Cer 42:1;2	0.0299026	0.0032227
Hex2Cer 42:2;3	0.00137112	0
Hex2Cer 42:1;3	0.000887197	0.0011544
CE 14:1	8.63774e-05	0
CE 14:0	0.000281593	0.000345943
CE 15:0	0	0.000254427
CE 16:2	0.000374076	0.00026764
CE 16:1	0.00060453	0.000534664
CE 16:0	0.00138657	0.00175179
CE 17:1	0.000319945	0.000169285
CE 17:0	0	0.000199243
CE 18:3	0.000439127	0.000292755
CE 18:2	0.00028974	0
CE 18:1	0.00172578	0.00165359
CE 18:0	0.000213627	0.000454101
CE 19:1	0.000150809	6.16832e-06
CE 20:4	0	0.000105886
CE 20:3	3.47693e-05	0.000204673
CE 20:2	6.46603e-05	0.000141835
CE 20:1	0.000317483	0.000110332
CE 22:6	0	0.000172641
CE 22:5	0.000154274	0
PE P-16:0/16:1	0.055645	0.0333866
PE P-16:0/18:2	0.0410354	0.0182394
PE P-16:0/18:1	0.51979	0.266039
PE P-16:0/20:5	0.0144284	0.00796743
PE P-16:0/20:4	0.0718948	0.0377941
PE P-16:0/20:3	0.105657	0.0521899
PE P-16:0/20:2	0.0354401	0.0167543
PE P-16:0/20:1	0.0462687	0.0221245
PE P-16:0/22:6	0.0347505	0.0196454
PE P-16:0/22:5	0.0288338	0.0158732
PE P-16:0/22:4	0.00688718	0.00213731
PE P-16:0/22:3	0.0083837	0.00604038
PE P-16:0/22:2	0.00737173	0.00445928
PE P-16:0/22:1	0.00695109	0.00309951
PE P-16:0/24:6	0.00108706	0.000668317
PE P-16:0/24:5	0.000544024	0.000616277
PE P-16:0/24:4	0.000396256	0.000676363
PE P-18:0/16:1	0.0465168	0.0235678
PE P-18:0/18:2	0.0266706	0.0145975
PE P-18:0/18:1	0.266679	0.123273
PE P-18:0/20:5	0.00979503	0.00498029
PE P-18:0/20:4	0.0513354	0.0270488
PE P-18:0/20:3	0.0807254	0.0393893
PE P-18:0/20:2	0.0215012	0.0116574
PE P-18:0/20:1	0.022011	0.0100473
PE P-18:0/22:6	0.0289379	0.0151762
PE P-18:0/22:5	0.0231574	0.0134494
PE P-18:0/22:4	0.00520821	0.0012512
PE P-18:0/22:3	0.00663358	0.00276351
PE P-18:0/22:2	0.00713485	0.00337902
PE P-18:0/24:6	0.00104758	0.000865893
PE P-18:0/24:5	0.000761938	0
PE P-18:0/24:4	8.89207e-05	0.000726498
PE P-18:1/16:1	0.108864	0.062168
PE P-18:1/16:0	0.0171474	0.00821524
PE P-18:1/18:2	0.0557469	0.0266359
PE P-18:1/18:1	0.900262	0.395625
PE P-18:1/18:0	0	0
PE P-18:1/20:5	0.0190195	0.0092442
PE P-18:1/20:4	0.102063	0.0442127
PE P-18:1/20:3	0.160921	0.0635759
PE P-18:1/20:2	0.0474132	0.0156493
PE P-18:1/20:1	0.0640258	0.025087
PE P-18:1/20:0	0.00257265	0.00123343
PE P-18:1/22:6	0.0575824	0.0259632
PE P-18:1/22:5	0.0365848	0.0194505
PE P-18:1/22:4	0.00528864	0.00270461
PE P-18:1/22:3	0.0106599	0.00450293
PE P-18:1/22:2	0.00983919	0.00407143
PE P-18:1/24:6	0.00159605	0.000570584
PE P-18:1/24:5	0.000603899	0.000885584
PE P-18:1/24:4	0.000563267	0.00154792
Chol	7.20276	4.16245
DG 28:2	0.00147424	0.00053112
DG 28:0	0.0018099	0.00127174
DG 29:0	0.00604122	0
DG 30:4	0.00115603	0.000337447
DG 30:1	0.00150754	0.000580658
DG 30:0	0.00449402	0.0037078
DG 31:1	0.00120797	0.000364931
DG 31:0	0.00267137	0.00251729
DG 32:2	0.00134009	0.00029704
DG 32:1	0.00267039	0.00124547
DG 32:0	0.0170238	0.00854742
DG 33:5	0.00174462	0.000620172
DG 33:2	0.00187484	0.00010924
DG 33:1	0.00235361	0.000498509
DG 33:0	0.00283045	0.00225341
DG 34:4	0.00122518	0.000224992
DG 34:2	0.00233324	0.0131322
DG 34:1	0.00857836	0.00774929
DG 34:0	0.0349167	0.0279321
DG 35:3	0	0.000146937
DG 35:2	0.00231337	0.00111423
DG 35:1	0.00166499	0.000822759
DG 35:0	9.81689e-05	0.000300187
DG 36:5	0.000351907	0.000224491
DG 36:4	0.00407878	0.00234338
DG 36:3	0.0258543	0.0298958
DG 36:2	0.00891434	0.00966683
DG 36:1	0.0122303	0.00970551
DG 36:0	0.0364711	0.0262069
DG 37:4	0.0031789	0.000787485
DG 38:5	0.00185955	0.00130794
DG 38:3	0.0213682	0.0224797
DG 38:2	0.00732702	0.00390823
DG 38:0	0	0
DG 40:2	0.00811353	0.00236682
DG 44:2	0	0
TG 39:0	0.000554476	0.000307127
TG 40:0	0.00137046	0.000470196
TG 41:0	0.000652399	0.000442253
TG 42:1	0.00105479	0.000322464
TG 42:0	0.00157121	0.000854296
TG 43:1	0.00102145	0
TG 43:0	0.00150788	0.000970995
TG 44:2	0.000722129	0.000287351
TG 44:1	0.000553541	0.000132426
TG 44:0	0.00365335	0.00197621
TG 45:1	0.00104198	0.000413046
TG 45:0	0.00286774	0.0017263
TG 46:3	0.000251547	7.42529e-05
TG 46:2	0.000720891	0.000185738
TG 46:1	0.00182299	0.000340782
TG 46:0	0.00379599	0.00226835
TG 47:3	0.000231908	0
TG 47:2	0.000725187	3.62196e-05
TG 47:1	0.00110888	7.46692e-05
TG 47:0	0.00199057	0.00134711
TG 48:6	0.004272	0.00303173
TG 48:3	0.000748688	0.000123647
TG 48:2	0.00020416	7.42765e-05
TG 48:1	0.000759698	0.000249307
TG 48:0	0.0015322	0.00167566
TG 49:3	0	0.00303911
TG 49:2	0.000394032	0
TG 49:1	0.000667249	9.75308e-05
TG 49:0	0.000719547	0.000561468
TG 50:4	4.22925e-05	5.47601e-05
TG 50:3	0.000379619	0.000224921
TG 50:2	0.00109887	0.000587844
TG 50:1	0.00114705	0.000553838
TG 50:0	0.00122372	0.00103078
TG 51:3	0.000176561	0.000122032
TG 51:2	0	0.00588686
TG 51:0	2.96735e-05	2.89823e-05
TG 52:5	0.000725285	0
TG 52:4	0.00238362	0.000654104
TG 52:3	0.00220664	0.00449499
TG 52:2	0.00284088	0.0010258
TG 52:1	0.000526438	9.02585e-05
TG 52:0	0.000203625	0.000285465
TG 53:3	0.00019688	7.36296e-05
TG 53:2	0.00027835	4.64584e-05
TG 53:1	0.000475282	1.04735e-05
TG 54:7	0.00120178	0.00010887
TG 53:0	5.33003e-05	5.07453e-05
TG 54:6	0.00454295	0.000412626
TG 54:5	0.00545962	0.000814347
TG 54:4	0.00215474	0.000677593
TG 54:3	0.00666499	0.00194427
TG 54:2	0.00066848	0.000403963
TG 54:1	0.00134039	0.000146231
TG 54:0	0.000888361	0.000654681
TG 56:4	0.000267359	8.06445e-05
TG 56:3	1.73109e-05	0
TG 56:2	0.000570357	0.000199193
TG 56:1	0.000492349	8.31183e-06
TG 56:0	0.000107894	0.000148976
TG 58:2	0.000346559	7.17425e-05
